# Supplementary material for: Astrocytes amplify neurovascular coupling to sustained activation of neocortex in awake mice
Source: PubMed Central journal article supplement (PMC9780254; doi:10.1038/s41467-022-35383-2), 2022-12-22
Supplement: 41467_2022_35383_MOESM1_ESM.pdf [file 41467_2022_35383_MOESM1_ESM.pdf]

## Supplementary Information, Institoris A et al.

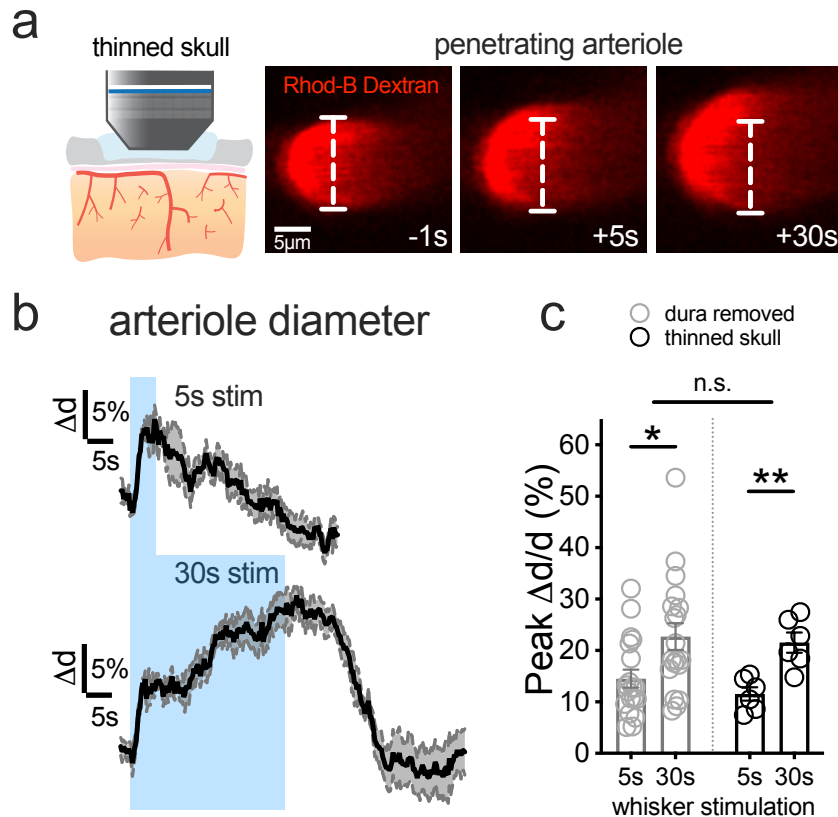

**Supplementary Figure 1: The bimodal functional hyperemia response is preserved after dura removal.** **a)** Cartoon of the experimental preparation (*Left*) and 2-photon images of i.v. Rhodamine (Rhod)-B-dextran (red) labelled penetrating arteriole (PA) before and during 30sec whisker stimulation imaged through an acute thinned skull preparation (*Right*). Example of 6 experiments in 3 mice. **b)** Averaged traces of arteriole dilation to 5sec (upper) and 30sec (lower) whisker stimulation shows a bimodal arteriole response to 30sec stimulation in a thinned skull preparation.  $N=6$  PA (average of 18 trials) from 3 mice. Data shown are mean  $\pm$  SEM. **c)** Summary data of peak diameter changes of PA (trials averaged) comparing responses of the thinned skull preparation (black) to the responses of dura removed preparation (grey). Dura removed: Paired  $t$  test (two-sided)  $t(18)=2.46$ ;  $*p=0.0242$ .  $N=19$  PA (average of 2-3 trials per PA) from 14 mice. Thinned skull: Paired  $t$  test (two-sided)  $t(5)=5.02$ ;  $**p=0.0040$ .  $N=6$  PA (average of 1 8 trials) from 3 mice. Dura removed vs. thinned skull: Two-way ANOVA (two-sided).  $F(1,23)=0.5130$ , overall effect  $p<0.4557$ . Data shown are mean  $\pm$  SEM. Source data are provided as a Source Data file.

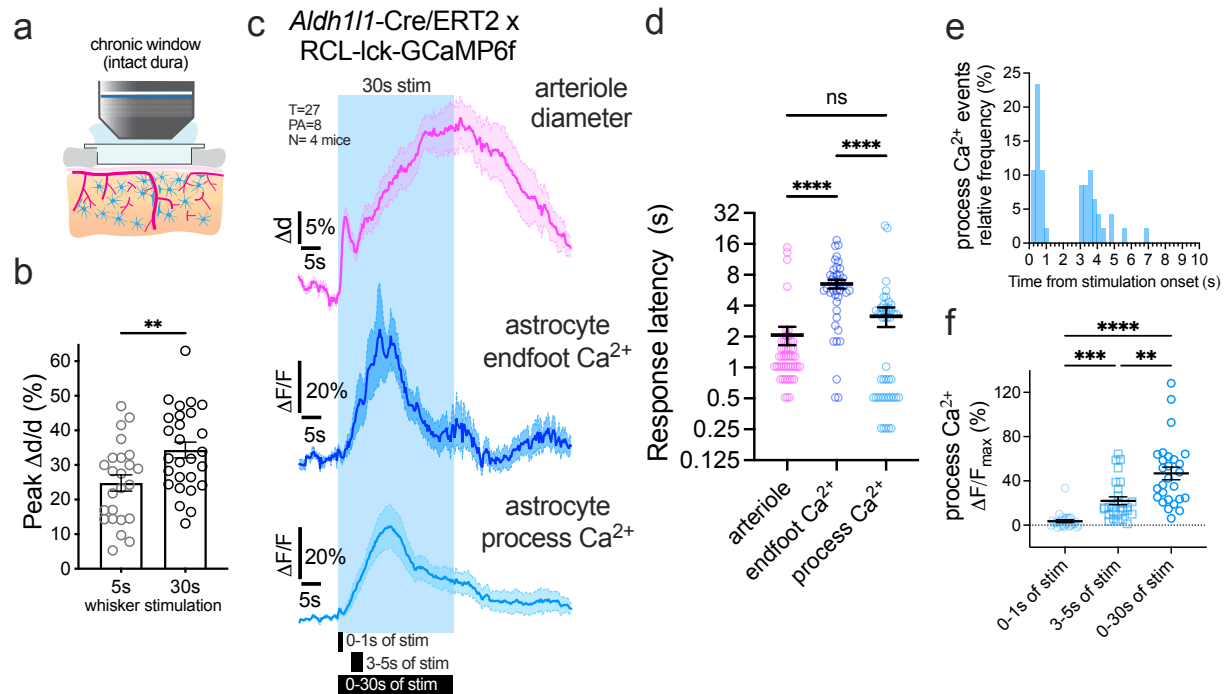

**Supplementary Figure 2: Astrocyte  $Ca^{2+}$  signals of membrane tethered GCaMP6f during sustained functional hyperemia.** **a)** Cartoon of the chronic cranial window preparation implanted with a T-shaped circular coverslip over the dura. **b)** Averaged traces of arteriole dilation to 5sec and 30sec whisker stimulation. Unpaired *t* test;  $t(49)=2.908$ ;  $**p=0.0055$ . 5s:  $n=24$  trials from 8 penetrating arterioles (PA), 30s:  $n=27$  trials of 9 PA from 4 mice. Data shown are mean  $\pm$  SEM. **c)** Arteriole diameter (magenta), astrocyte endfoot  $Ca^{2+}$  (dark blue) and fine process  $Ca^{2+}$  (light blue) responses (mean  $\pm$  SEM) to 30sec whisker stimulation.  $N=9$  PA or region of interest (ROI) (average of 3 trials each) from 4 mice. **d)** Summary of response onset (latency of signal  $>$  3 x standard deviation above baseline) for dilation and astrocyte  $Ca^{2+}$ . Kruskal-Wallis test (one-sided) with Dunn's post hoc comparison.  $H(134)=39.26$ ; overall effect:  $****p<0.0001$ . Arteriole vs endfoot  $Ca^{2+}$ :  $****p<0.0001$ , arteriole vs process  $Ca^{2+}$ :  $p>0.9999$ , endfoot  $Ca^{2+}$  vs process  $Ca^{2+}$ :  $****p<0.0001$ . 5sec and 30sec stimulations were pooled. Arteriole  $n=50$  trials, endfoot  $Ca^{2+}$ :  $n=40$  trials, process  $Ca^{2+}$ :  $n=47$  trials of 9 PA or ROI from 4 mice. All data are mean  $\pm$  SEM. **e)** Relative frequency histogram of process  $Ca^{2+}$  events from stimulation onset reveals an ultrafast (0-1sec) and a delayed (3-5sec) population. **f)** The size of astrocyte process  $Ca^{2+}$  rise for ultrafast, delayed and overall (0-30sec) signals during stimulation. Friedman test (two-sided):  $Q(2)=52.63$ ;  $****p<0.0001$ , with Dunn's post hoc comparison: 0-1s of stim vs 3-5s of stim:  $***p=0.0003$ , 0-1s of stim vs. 0-30s of stim:  $****p<0.0001$ , 3-5s of stim vs. 0-30s of stim:  $**p=0.0033$ .  $N=27$  trials of 9 ROI from 4 mice. All data are mean  $\pm$  SEM. Source data are provided as a Source Data file.

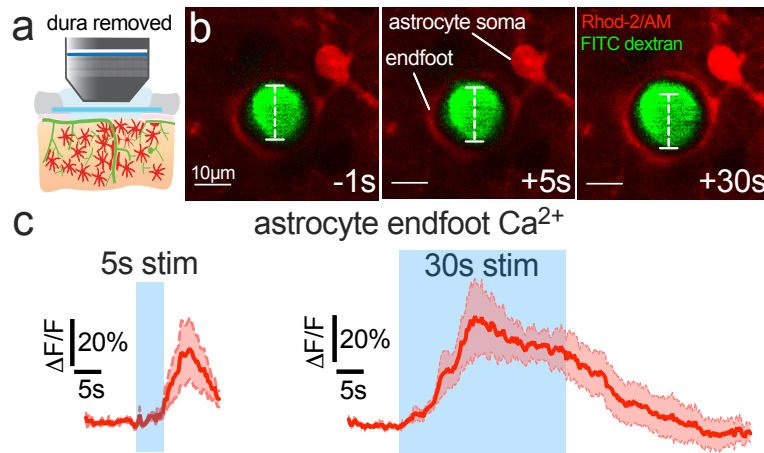

**Supplementary Figure 3. Astrocyte endfoot Ca<sup>2+</sup> signals of Rhod-2/AM loaded astrocytes.**

**a)** Representative cartoon of a dura-removed, fully sealed acute cranial window loaded with the Ca<sup>2+</sup> indicator Rhod-2/AM. **b)** Time series images (top) of a Rhod-2/AM labelled astrocyte around a FITC-dextran (green) labelled penetrating arteriole. Example of 7 experiments from 5 mice. **c)** Astrocyte Ca<sup>2+</sup> traces to 5sec (*Left*) and 30sec (*Right*) whisker stimulation. 5s stim:  $n=6$  ROI (average of 3-4 trials) in 4 mice. 30s stim:  $n=7$  ROI (average of 3-4 trials) in 5 mice. Data shown are mean  $\pm$  SEM. Source data are provided as a Source Data file.

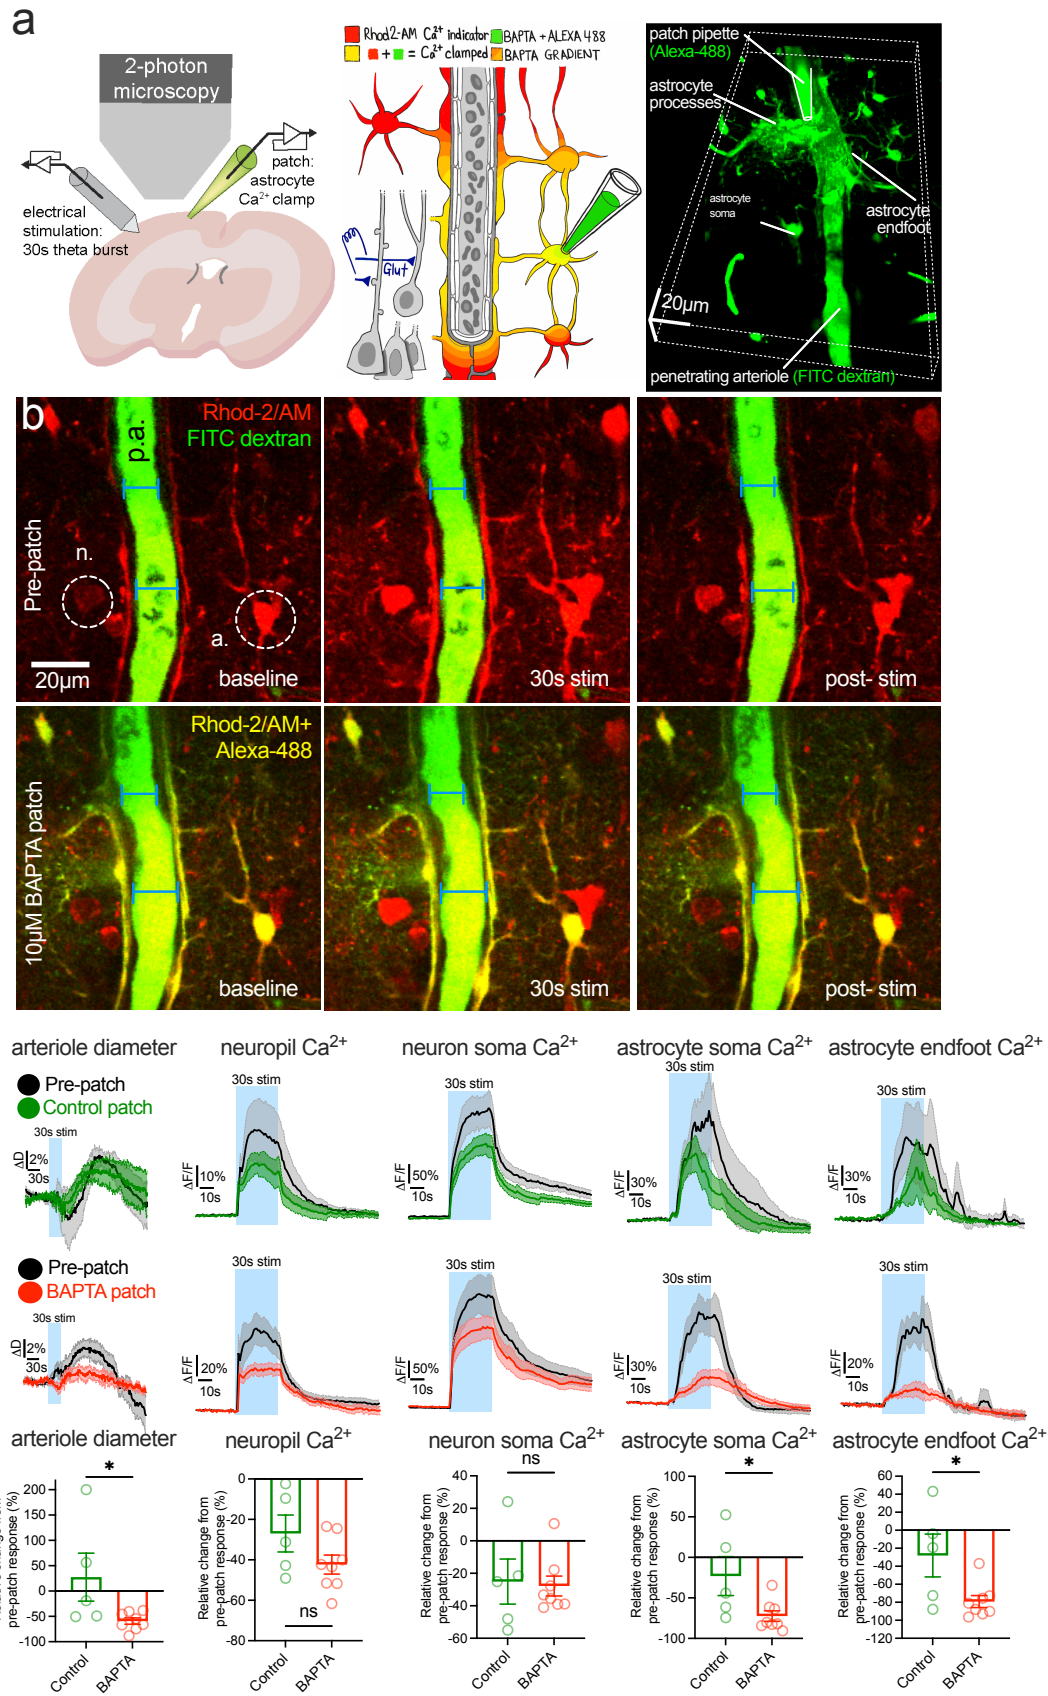

**Supplementary Figure 4: Astrocyte Ca<sup>2+</sup> clamp in brain slices with patched BAPTA reduces arteriole dilation to 30sec of high frequency afferent stimulation.** a) *Left:* cartoon of experimental brain slice setup. *Middle:* patch infusion of BAPTA into the astrocyte network. *Right:* rotated z-stack of astrocytes patch-filled with Alexa-488 hydrazide (green) around a FITC-dextran labelled penetrating arteriole (PA) (green). Example of 13 slice experiments from 13 rats. b) *Upper:* Image time series showing astrocyte Ca<sup>2+</sup> elevation and dilation to 30sec of theta burst electrical stimulation of afferents. Red: Rhod-2/AM labelled astrocytes (brighter) and neurons (fainter). Green: FITC-dextran labelled PA. *Lower:* the same stimulation is given in the presence of astrocyte network Ca<sup>2+</sup> clamp (yellow astrocytes) and vasodilation is blocked. c and d) Average time series traces in response to 30 sec of afferent stimulation showing arteriole diameter, neuropil Ca<sup>2+</sup>, neuron soma Ca<sup>2+</sup>, astrocyte soma Ca<sup>2+</sup> and endfoot Ca<sup>2+</sup>. Control, pre-patch traces are shown (black), followed by a patch infusion of a control internal solution (upper green traces) or a Ca<sup>2+</sup> clamp internal solution containing BAPTA (lower red traces). Control patch: *n*=5 slices from 5 rats. BAPTA patch: *n*=8 slices from 8 rats. Data shown are mean ± SEM. e) Summary data of percent changes from the pre-patch responses to either the control patch or the BAPTA patch condition. These data show that only the reduction in astrocyte Ca<sup>2+</sup> can explain the loss of dilation to 30sec stimulation in the astrocyte BAPTA patch condition. Arteriole diameter: Unpaired *t* test (two-sided): *t*(11)=2.331; \**p*=0.0398. Neuropil Ca<sup>2+</sup>: Unpaired *t* test (two-sided): *t*(11)=1.662; *p*=0.1247. Neuron soma Ca<sup>2+</sup>: Mann-Whitney test (two-sided): *U*=20; *p*>0.9999. Astrocyte soma Ca<sup>2+</sup>: Unpaired *t* test (two-sided): *t*(11)=2.438; \**p*=0.033. Astrocyte endfoot Ca<sup>2+</sup>: Mann-Whitney test (two-sided): *U*=5; \**p*=0.0295. Control patch: *n*=5 slices from 5 rats. BAPTA patch: *n*=8 slices from 8 rats. Data shown are mean ± SEM. Source data are provided as a Source Data file.

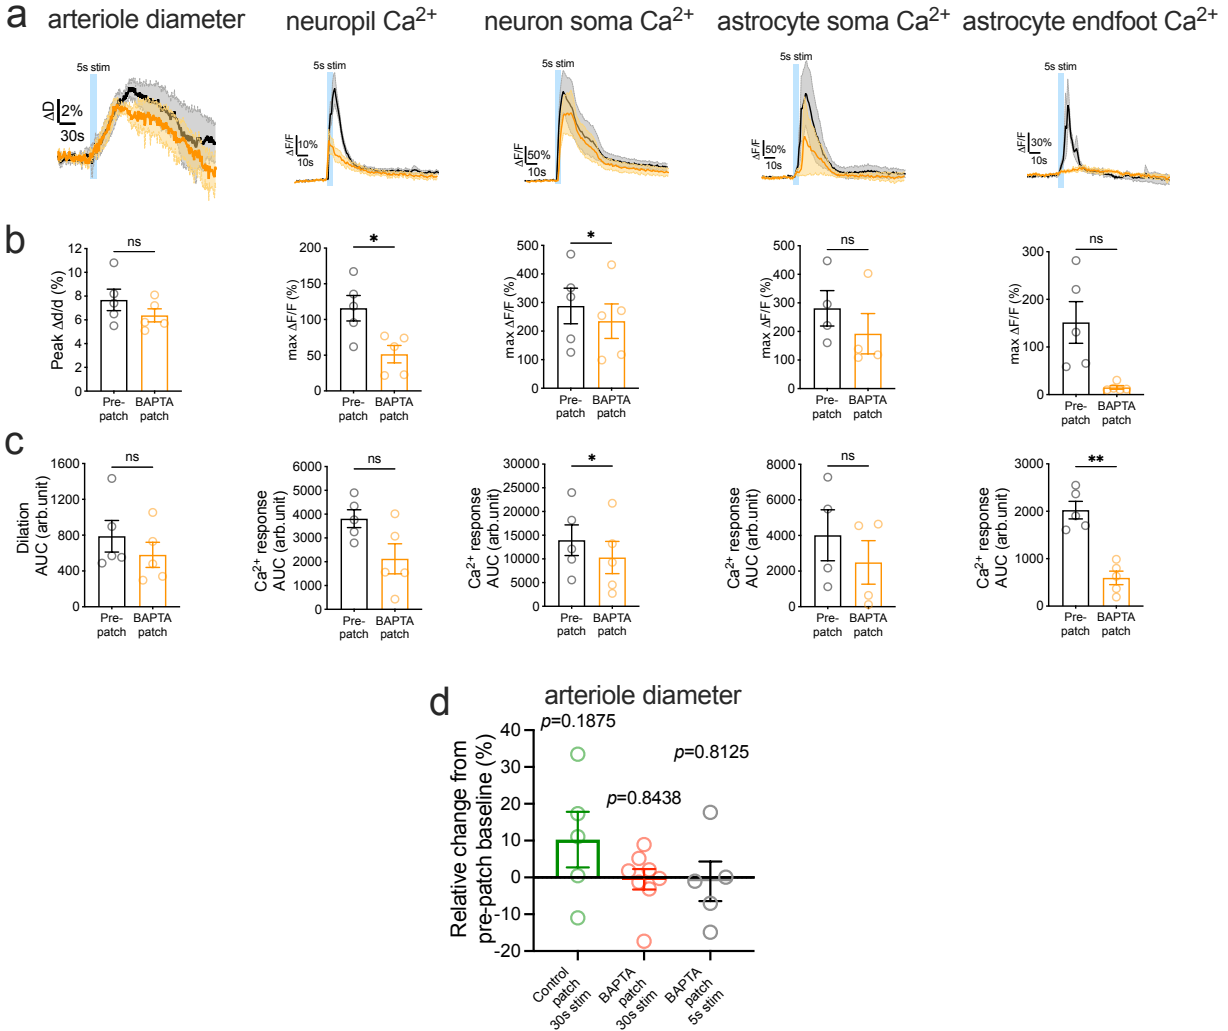

**Supplementary Figure 5: Astrocyte  $\text{Ca}^{2+}$  clamp in brain slices with patched BAPTA has no effect on evoked arteriole dilation to 5sec high frequency afferent stimulation.**

**a)** Average time series traces (mean  $\pm$  SEM) in response to 5sec of theta burst afferent stimulation in pre-astrocyte patch (black) or  $\text{Ca}^{2+}$  clamp patch (orange) showing arteriole diameter, neuropil  $\text{Ca}^{2+}$ , neuron soma  $\text{Ca}^{2+}$ , astrocyte soma  $\text{Ca}^{2+}$  and endfoot  $\text{Ca}^{2+}$ .  $N=5$  slices from 5 rats. **b)** Summary data of peak responses (mean  $\pm$  SEM). Peak  $\Delta d/d$ : Paired  $t$  test (two-sided):  $t(4)=0.9802$ ;  $p=0.3825$ . Neuropil  $\text{Ca}^{2+}$  max $\Delta F/F$ : Paired  $t$  test (two-sided):  $t(4)=2.942$ ;  $*p=0.0423$ . Neuron soma  $\text{Ca}^{2+}$  max $\Delta F/F$ : Paired  $t$  test (two-sided):  $t(4)=3.450$ ;  $*p=0.0261$ . Astrocyte soma  $\text{Ca}^{2+}$  max $\Delta F/F$ : Wilcoxon test (two-sided):  $W=-10$ ;  $p=0.125$ . Astrocyte endfoot  $\text{Ca}^{2+}$  max  $\Delta F/F$ : Wilcoxon test (two-sided):  $W=-15$ ;  $p=0.0625$ . **c)** Summary data of area under the curve (AUC). Dilation AUC (arbitrary(arb.) unit): Paired  $t$  test (two-sided):  $t(4)=0.9802$ ;  $p=0.3825$ . Neuropil  $\text{Ca}^{2+}$  response AUC: Paired  $t$  test (two-sided):  $t(4)=2.417$ ;  $p=0.073$ . Neuron soma  $\text{Ca}^{2+}$  response AUC: Paired  $t$  test (two-sided):  $t(4)=3.345$ ;  $*p=0.0287$ . Astrocyte soma  $\text{Ca}^{2+}$  response AUC: Paired  $t$  test (two-sided):  $t(4)=3.079$ ;  $p=0.0542$ . Astrocyte endfoot  $\text{Ca}^{2+}$  response AUC: Paired  $t$  test (two-sided):  $t(4)=5.584$ ;  $**p=0.005$ .  $N=5$  slices from 5 rats. Data are mean  $\pm$  SEM. **d)** Summary data showing that neither the control patch internal solution, nor the  $\text{Ca}^{2+}$  clamp internal solution to 100nM free

Ca<sup>2+</sup> (in the 5sec and 30sec experiments) affected resting arteriole diameter after the 15min whole-cell equilibration period. Pre-patch arteriole baseline is set as 0% for all 3 experiments. Pre-patch vs. Control patch 30s stim: Wilcoxon test (two-sided):  $W=11$ ;  $p=0.1875$  ( $n=5$  slices from 5 rats), pre-patch vs. BAPTA patch 30s stim: Wilcoxon test (two-sided):  $W=4$ ;  $p=0.8438$  ( $n=8$  slices from 8 rats), pre-patch vs. BAPTA patch 5s stim: Wilcoxon test (two-sided):  $W=-3$ ;  $p=0.8125$  ( $n=5$  slices from 5 rats). Columns and error bars are mean  $\pm$  SEM. Source data are provided as a Source Data file.

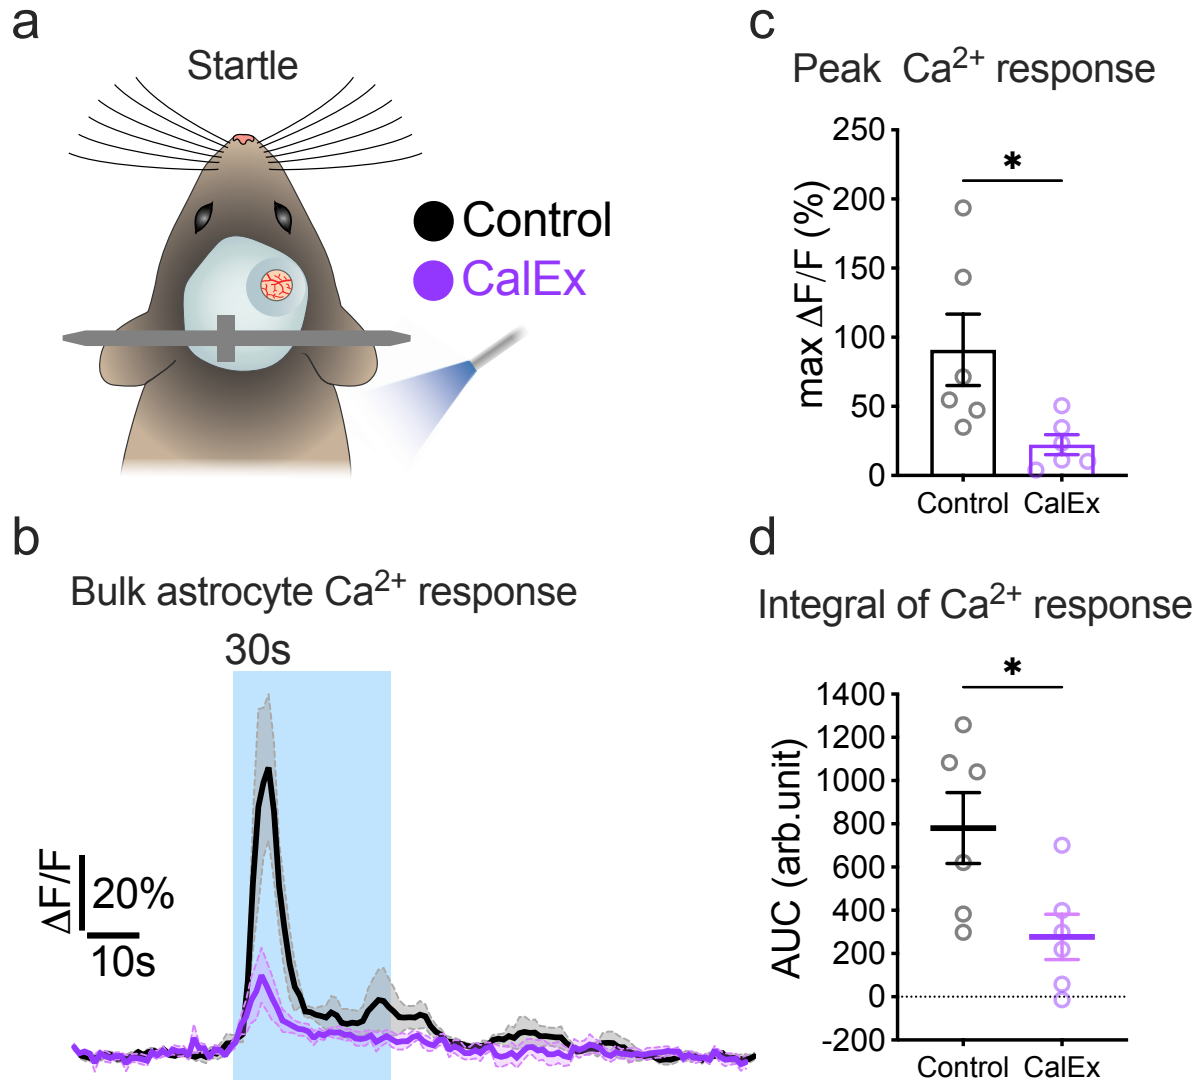

**Supplementary Figure 6: Expression of astrocytic plasma membrane  $\text{Ca}^{2+}$  ATPase (CalEx) decreases the evoked  $\text{Ca}^{2+}$  response to startle.** **a)** Cartoon of experimental setup using an untrained body air puff to startle the mouse. **b)** Average time series curves of astrocyte  $\text{Ca}^{2+}$  in response to startle, with CalEx and GCaMP6f AAV (purple) vs control AAVs (black).  $N=6$  regions of interests (ROI) in 6 mice for both groups. Curves show mean  $\pm$  SEM. **c)** Summary data of peak  $\text{Ca}^{2+}$  response (max  $\Delta F/F\%$ ). Unpaired  $t$  test (two-sided):  $t(10)=2.555$ ;  $*p=0.0286$ . Data shown are mean  $\pm$  SEM. **d)** Summary data of integral  $\text{Ca}^{2+}$  response calculated as area under the curve (AUC). Unpaired  $t$  test (two-sided):  $t(10)=2.588$ ;  $*p=0.0271$ .  $N=6$  regions of interests (ROI) in 6 mice for both Control and CalEx groups in *c-d*. Data shown are mean  $\pm$  SEM. Source data are provided as a Source Data file.



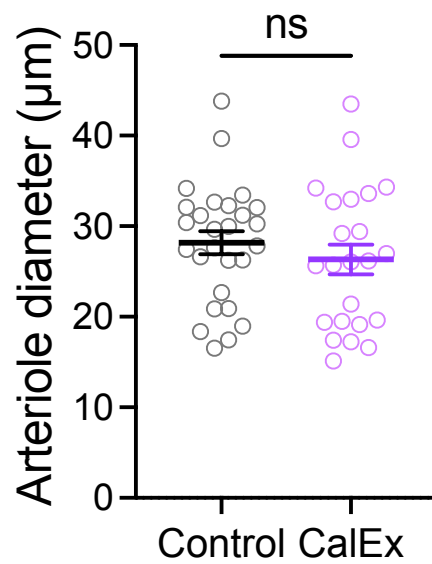

**Supplementary Figure 7: CalEx did not change baseline penetrating arteriole (PA) diameter.**

Baseline arteriole diameter of Control ( $n=27$  PA from  $N=11$  mice) and CalEx ( $n=23$  PA from 10 mice) arterioles calculated from averaged 10sec pre-stimulus baseline recording (3-7 trials per PA). Unpaired  $t$  test (two-sided):  $t(48)=0.9077$ ;  $p=0.3686$ . Data presented are mean  $\pm$  SEM. Source data are provided as a Source Data file.

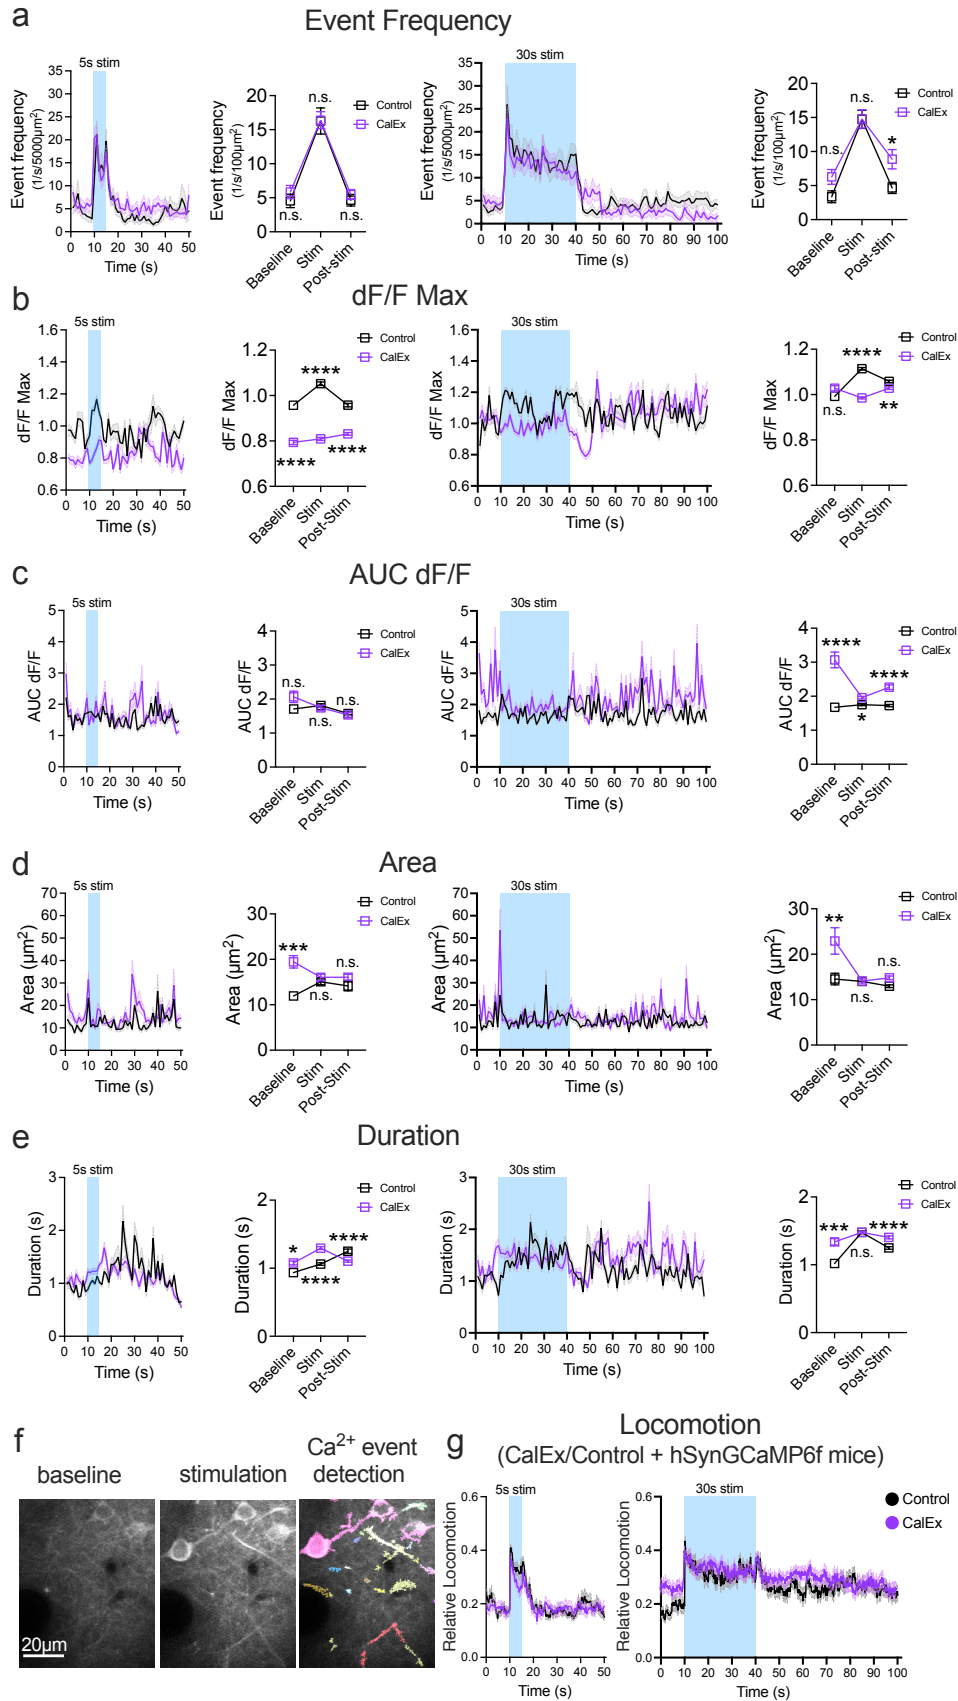

**Supplementary Figure 8: Automated Ca<sup>2+</sup> event detection analysis shows neuronal Ca<sup>2+</sup> differences are unrelated to CalEx effect on arteriole.**

**a) Left:** Absolute neuronal (soma + neuropil) Ca<sup>2+</sup> event frequency curves (1sec binning of 7.91Hz recording, mean ± SEM) Control (black), CalEx (purple) and averaged event frequencies of baseline, stimulation, and post-stimulation periods for 5sec whisker stimulation. Two-way repeated measures ANOVA with Sidak's multiple comparison test (two-sided). For 5s stim Control vs. CalEx comparison:  $F(1,57)=0.4223$ , overall effect  $p=0.5184$ . Baseline  $p=0.7299$ , Stim  $p>0.9999$ , Post-stim  $p=0.842$ . Control:  $n=27$  trials of 10 experiments from 5 mice. CalEx:  $n=32$  trials of 11 experiments from 5 mice. **Right:** Same but for 30sec stimulation. Two-way repeated measures ANOVA with Sidak's multiple comparison test (two-sided). For 30s stim Control vs. CalEx comparison:  $F(1,61)=3.982$ , overall effect  $p=0.0505$ . Baseline  $p=0.1151$ , Stim  $p>0.9999$ , Post-stim  $*p=0.0382$ . Control:  $n=28$  trials of 10 experiments from 5 mice. CalEx:  $n=35$  trials of 11 experiments from 5 mice. Same layout for panels b-e. Data presented are mean ± SEM. **b) Summary curves and averaged values of baseline, 5sec (Left) and 30sec (Right) stimulation and post-stimulation periods for maximal relative fluorescence of individual events (Max dF/F) show significantly larger Ca<sup>2+</sup> peaks for control than for CalEx-injected mice but not during the later phase of 30sec stimulation. Two-way ANOVA with Tukey's multiple comparison test (two-sided). For 5s stim Control vs. CalEx comparison:  $F(1,18721)=643.8$ , overall effect  $****p<0.0001$ . Baseline  $****p<0.0001$ , Stim  $****p<0.0001$ , Post-stim  $****p<0.0001$ . Control:  $n=27$  trials of 10 experiments from 5 mice. CalEx:  $n=32$  trials, 11 experiments from 5 mice. **Right:** Same but for 30sec stimulation. Two-way ANOVA with Tukey's multiple comparison test (two-sided). For 30s stim Control vs. CalEx comparison:  $F(1,50412)=28.85$ , overall effect  $****p<0.0001$ . Baseline  $p=0.5101$ , Stim  $****p<0.0001$ , Post-stim  $**p=0.0017$ . Control:  $n=28$  trials of 10 experiments from 5 mice. CalEx:  $n=35$  trials of 11 experiments from 5 mice. **c) Area Under the Curve (AUC) of individual neuronal Ca<sup>2+</sup> event-related fluorescence changes (dF/F) demonstrate larger signals during baseline in the CalEx group. Two-way ANOVA with Tukey's multiple comparison test (two-sided). For 5s stim Control vs. CalEx comparison:  $F(1,15444)=1.271$ , overall effect  $p=0.2595$ . Baseline  $p=0.1588$ , Stim  $p=0.9716$ , Post-stim  $p=0.9995$ . Control:  $n=27$  trials of 10 experiments from 5 mice. CalEx:  $n=32$  trials of 11 experiments from 5 mice. **Right:** Same but for 30sec stimulation. Two-way ANOVA with Tukey's multiple comparison test (two-sided). For 30s stim Control vs. CalEx comparison:  $F(1,50412)=91.79$ , overall effect  $****p<0.0001$ . Baseline  $****p<0.0001$ , Stim  $*p=0.0111$ , Post-stim  $****p<0.0001$ . Control:  $n=28$  trials of 10 experiments from 5 mice. CalEx:  $n=35$  trials of 11 experiments from 5 mice. **d) Area (size) of individual neuronal Ca<sup>2+</sup> events are also larger at baseline for CalEx than control. Two-way ANOVA with Tukey's multiple comparison test (two-sided). For 5s stim Control vs. CalEx comparison:  $F(1,18721)=20.31$ , overall effect  $****p<0.0001$ . Baseline  $p=0.0002$ , Stim  $p=0.9452$ , Post-stim  $p=0.4596$ . Control:  $n=27$  trials of 10 experiments from 5 mice. CalEx:  $n=32$  trials of 11 experiments from 5 mice. **Right:** Same but for 30sec stimulation. Two-way ANOVA with Tukey's multiple comparison test (two-sided). For 30s stim Control vs. CalEx comparison:  $F(1,50412)=18.17$ , overall effect  $****p<0.0001$ . Baseline  $**p<0.0016$ , Stim  $*p>0.9999$ , Post-stim  $p<0.2225$ . Control:  $n=28$  trials of 10 experiments from 5 mice. CalEx:  $n=35$  trials of 11 experiments from 5 mice. **e) The average duration of Ca<sup>2+</sup> events for CalEx-injected mice are overall longer than for control virus injected mice except during sustained stimulation. Two-way ANOVA with Tukey's multiple comparison test (two-sided). For 5s stim Control vs. CalEx comparison:  $F(1,18721)=12.92$ , overall effect  $***p=0.0003$ . Baseline  $p=0.0377$ , Stim  $****p<0.0001$ , Post-stim  $****p<0.0001$ . Control:  $n=27$  trials of 10 experiments from 5 mice. CalEx:  $n=32$  trials of 11 experiments from 5 mice. **Right:** Same but for 30sec stimulation. Two-way ANOVA with Tukey's multiple comparison test (two-sided). For 30s stim Control vs.********

CalEx comparison:  $F(1,50412)=29.04$ , overall effect \*\*\*\* $p<0.0001$ . Baseline \*\*\* $p<0.0008$ , Stim \* $p>0.9999$ , Post-stim \*\*\*\* $p<0.0001$ . Control:  $n=28$  trials of 10 experiments from 5 mice. CalEx:  $n=35$  trials of 11 experiments from 5 mice. All data in panels a-e are mean  $\pm$  SEM. **f**) Raw 2-photon image of neuronal  $Ca^{2+}$  events in GCaMP6f expressing neuronal structures in layer 2 of the barrel cortex (*Left*) before and (*Middle*) during whisker stimulation. *Right*: Colour-coded detection of individual  $Ca^{2+}$  events by an automated  $Ca^{2+}$  event detection toolkit (<https://github.com/yu-lab-vt/AQuA>). **g**) Summary of relative locomotion curves for 5sec (*Left*) and 30sec (*Right*) whisker stimulation in mice injected with CalEx or its mutant control virus mixed with an AAV-hSynGCaMP6f virus indicate similar locomotion pattern during 30sec stimulation. Locomotion differences at baseline and 5sec stimulation between control and CalEx could account for the differences in individual  $Ca^{2+}$  event properties. Control 5sec:  $n=28$  trials, 30sec:  $n=30$  trials in 5 mice. CalEx 5sec:  $n=31$  trials, 30sec:  $n=37$  trials in 5 mice. Traces are mean  $\pm$  SEM. Source data are provided as a Source Data file.

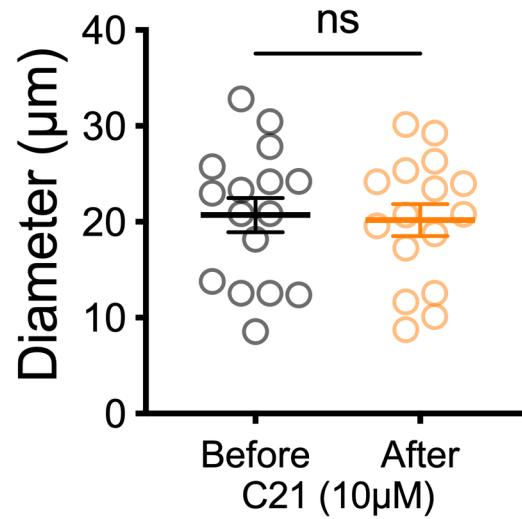

**Supplementary Figure 9: Arteriole baseline diameter is not different before and after 1 hour of continuous astrocyte Gq receptor activation with C21.** Baseline arteriole diameter before and after C21 application was calculated from averaged 10sec pre-stimulus baseline recording ( $n=16$  penetrating arterioles (PA) from 6 mice, 2-3 trials per PA). Paired  $t$  test (two-sided):  $t(15)=0.3219$ ;  $p=0.752$ . Data presented are mean  $\pm$  SEM. Source data are provided as a Source Data file.

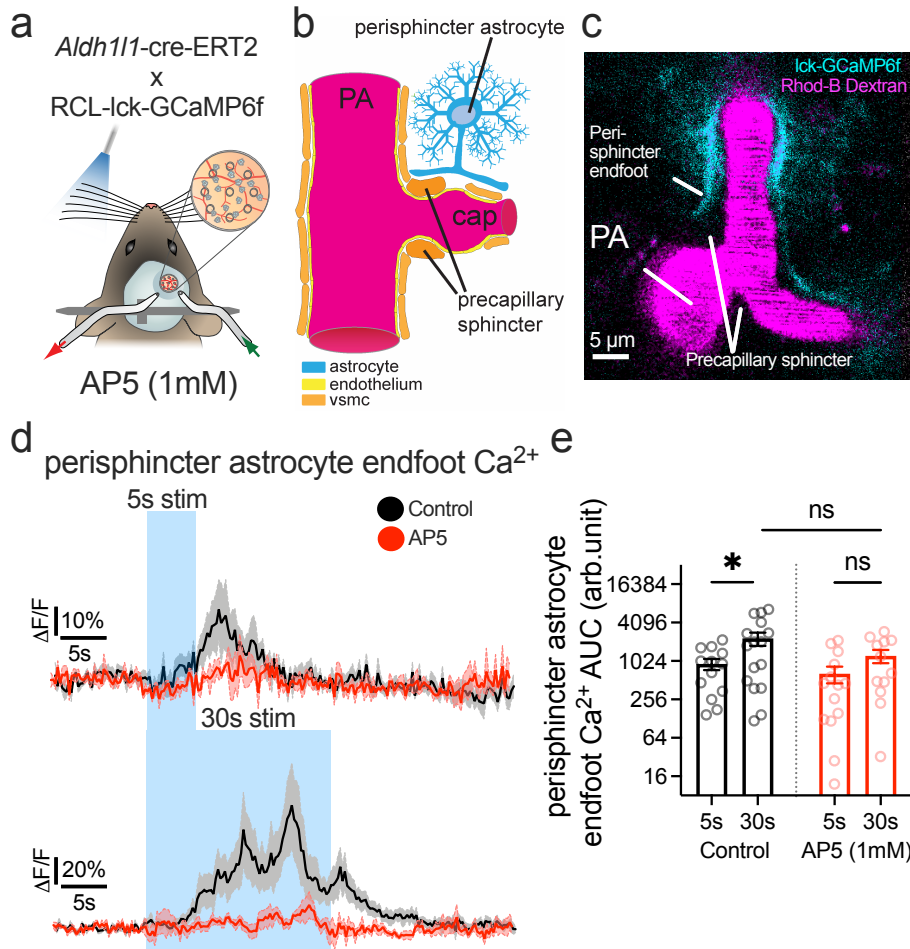

**Supplementary Figure 10: Peri-sphincter astrocyte  $\text{Ca}^{2+}$  in response to 5sec and 30sec whisker stimulation.** a) Cartoon of *in vivo* experimental setup using membrane tethered GCaMP6f in astrocytes. b) Cartoon depicting astrocyte of interest (blue), adjacent to a pre-capillary sphincter. Vsmc: vascular smooth muscle cell, cap: capillary, PA: penetrating arteriole. c) 2-photon image of a PA (magenta, median filtered) and a narrowing at the first branch off the penetrator where mural sphincter cells are located. Surrounding astrocytes expressing membrane targeted Ick-GCaMP6f (blue) are shown. Example of experiments from 6 mice. d) Average time series trace data of astrocyte endfoot  $\text{Ca}^{2+}$  in pre-drug control (black) and in the presence of AP5 (red) surrounding an arteriole sphincter in response to 5sec ( $n=13$  trials at 5 PA from 5 mice) or 30sec ( $n=16$  trials at 6 PA from 6 mice) whisker stimulation. e) Summary data of perisphincter astrocyte endfoot  $\text{Ca}^{2+}$  area under the curve (AUC). Two-way ANOVA with Tukey's multiple comparisons test (two-sided). For stimulation length comparison,  $F(1,51)=7.270$ , overall effect  $**p<0.0095$ ; Control (5s vs. 30s)  $*p<0.0396$ , AP5 (5s vs. 30s)  $p=0.688$ . For AP5 treatment comparison,  $F(1,51)=3.366$ , overall effect  $p<0.0724$ ; 5s (Control vs. AP5)  $p=0.9533$ , 30s (Control vs. AP5)  $p=0.1737$ . Interaction between stimulation length and AP5 treatment  $F(1,51)=1.195$ , overall effect  $p<0.2795$ . Data are shown as mean  $\pm$  SEM. Source data are provided as a Source Data file.

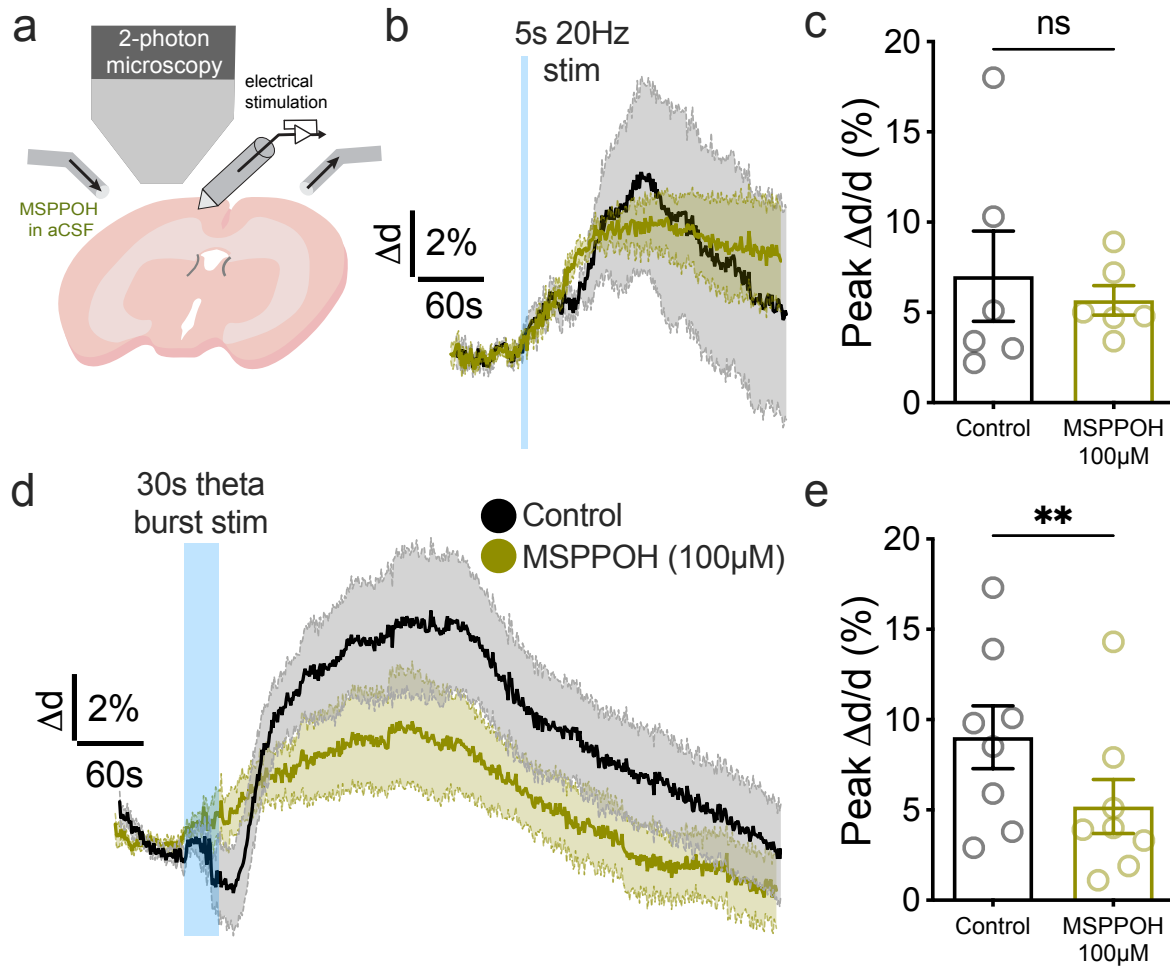

**Supplementary Figure 11: Epoxygenase inhibition with MSPPOH reduces arteriole dilation to 30sec high frequency afferent stimulation but not to 5sec.** **a)** Cartoon of experimental brain slice setup with electrical afferent stimulation. ACSF: artificial cerebrospinal fluid. **b)** Average  $\pm$  SEM traces of evoked arteriole dilation to 5sec stim in pre-drug control (black) and in the presence of MSPPOH (green). **c)** Summary data (mean  $\pm$  SEM) for 5sec stim, showing no effect of MSPPOH on peak arteriole diameter change ( $\Delta d/d\%$ ). Paired  $t$  test (two-sided).  $t(5)=0.7638$ ;  $p=0.4794$ .  $N=6$  slices from 5 rats. **d)** Average  $\pm$  SEM traces of evoked arteriole dilation to 30sec electrical stim in pre-drug control (black) and in the presence of MSPPOH (green). **e)** Summary data (mean  $\pm$  SEM) for 30sec stim, showing a significant reduction in peak arteriole diameter change ( $\Delta d/d\%$ ) by MSPPOH. Paired  $t$  test (two-sided).  $t(7)=3.521$ ;  $**p=0.0097$ .  $N=8$  slices from 7 rats. Source data are provided as a Source Data file.

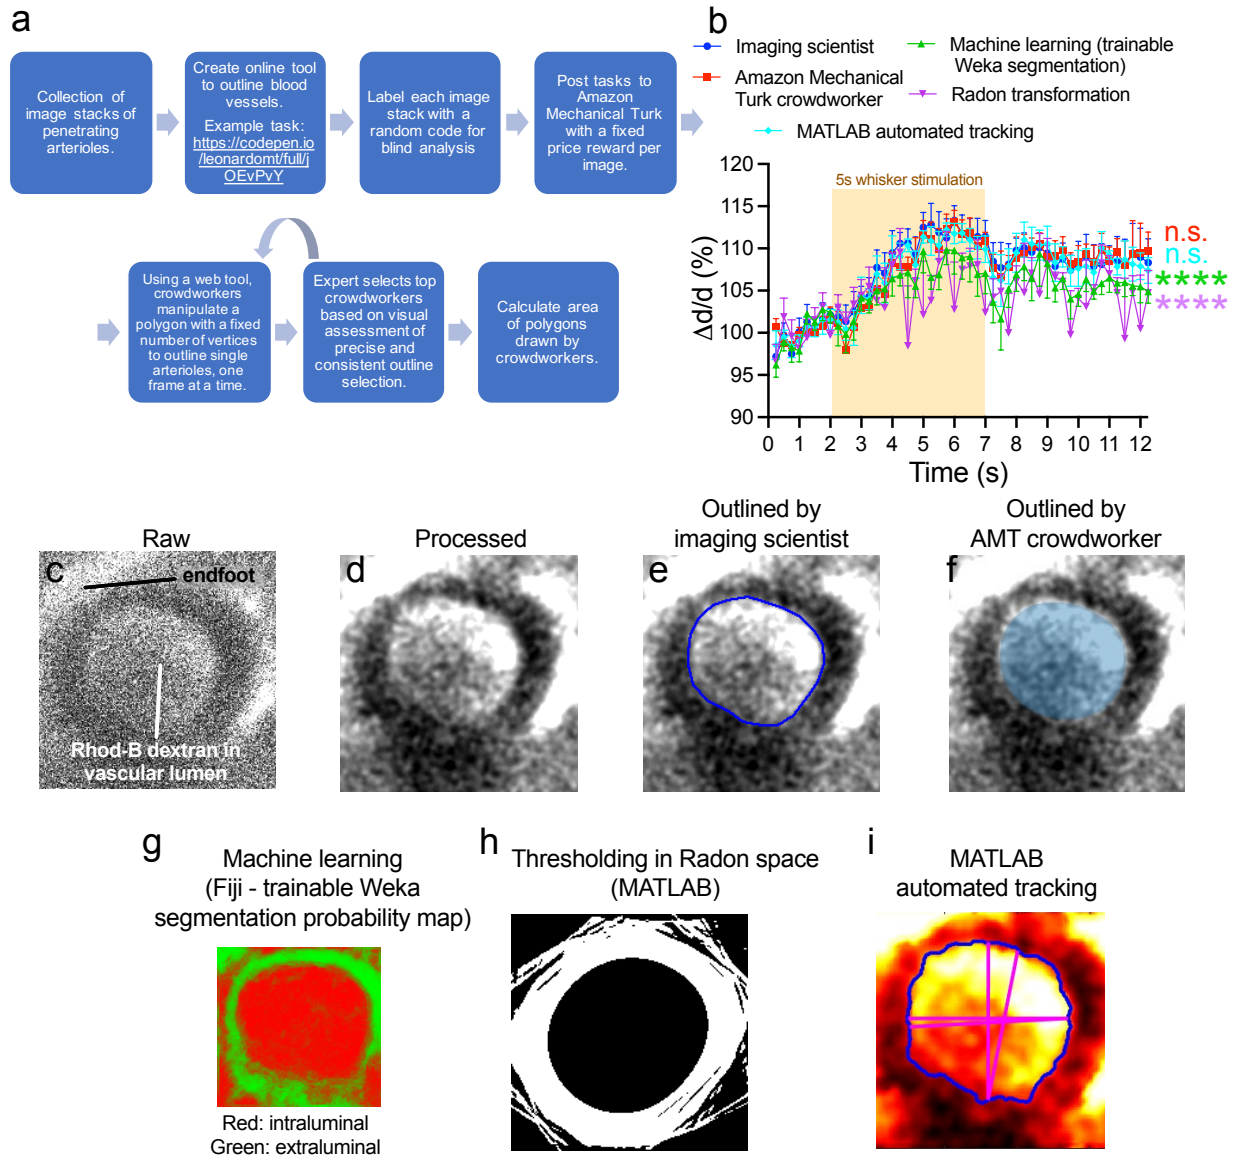

**Supplementary Figure 12: Validation of crowd sourced analysis of arteriole diameter changes.** **a)** Workflow of analysis using Amazon Turk with validation by imaging scientist. **b)** Analysis of arteriole diameter changes by ‘trained’ crowd-workers sourced via Amazon Turk (red) and MATLAB automated tracking (cyan) performed equally well as a trained imaging scientist (blue). Both these analyses outperformed an ImageJ machine learning tool called WEKA (green) as well as implementing a radon transform of the data (purple) (PMID 24736890). Friedman’s test with Dunn’s multiple comparison test.  $F(4)=36.71$ , overall significance \*\*\*\* $p<0.0001$ . Imaging scientist vs. machine learning: \*\*\*\* $p<0.0001$ , imaging scientist vs. Radon transform: \*\*\*\* $p<0.0001$  (purple), imaging scientist vs. Amazon Turk:  $p=0.2946$  (red n.s.), imaging scientist vs. MATLAB automated tracking:  $p=33.81$  (cyan n.s.).  $N=5$  trials of 5 arterioles from 4 mice. Data presented are mean + or – SEM. **c-i)** representative images of arteriole lumen pre-processing (**c,d**) followed by the identification of the arteriole lumen by either an imaging scientist (**e**) or a crowd-worker (**f**), WEKA segmentation (**g**), thresholding in Radon Space (**h**), and MATLAB automated tracking based on Thirion’s DEMONS algorithm (**i**). Source data are provided as a Source Data file.



**Supplementary Table 1:** Details of statistical analysis related to Figure 1.

**Figure 1d**

| Friedman test (one-sided)        |         |                  |
|----------------------------------|---------|------------------|
| Q                                | Summary | P value          |
| 11.14                            | **      | 0.0012           |
| Dunn's multiple comparisons test |         |                  |
| Group comparisons                | Summary | Adjusted P Value |
| 1s vs. 5s                        | ns      | >0.9999          |
| 1s vs. 30s                       | **      | 0.004            |
| 5s vs. 30s                       | *       | 0.0485           |

**Figure 1e**

| Mixed effects model (Regression Model)                                    |         |                  |
|---------------------------------------------------------------------------|---------|------------------|
| F (DFn, DFd)                                                              | Summary | P value          |
| F (1.481, 40.74) = 17.21                                                  | ****    | <0.0001          |
| Holm-Sidak's multiple comparison test                                     |         |                  |
| Group comparisons                                                         | Summary | Adjusted P Value |
| arteriole dilation vs. astrocyte endfoot Ca <sup>2+</sup>                 | ****    | <0.0001          |
| arteriole dilation vs. astrocyte process Ca <sup>2+</sup>                 | *       | 0.0118           |
| astrocyte endfoot Ca <sup>2+</sup> vs. astrocyte process Ca <sup>2+</sup> | *       | 0.0118           |

**Supplementary Table 2:** Details of statistical analysis related to Figure 2.

**Figure 2g**

| <b>Peak arteriole dilation</b>    |                   |                  |
|-----------------------------------|-------------------|------------------|
| ANOVA table                       | F (DFn, DFd)      | P value          |
| Interaction                       | F (1, 96) = 5.992 | P=0.0162         |
| Stimulation length                | F (1, 96) = 32.32 | P<0.0001         |
| CalEx                             | F (1, 96) = 5.713 | P=0.0188         |
| Tukey's multiple comparisons test | Summary           | Adjusted P Value |
| 5s:Control vs. 5s:CalEx           | ns                | >0.9999          |
| 5s:Control vs. 30s:Control        | ****              | <0.0001          |
| 5s:Control vs. 30s:CalEx          | ns                | 0.1028           |
| 5s:CalEx vs. 30s:Control          | ****              | <0.0001          |
| 5s:CalEx vs. 30s:CalEx            | ns                | 0.1296           |
| 30s:Control vs. 30s:CalEx         | **                | 0.0046           |

| <b>net Area Under the Curve of arteriole dilation</b> |                   |                  |
|-------------------------------------------------------|-------------------|------------------|
| ANOVA table                                           | F (DFn, DFd)      | P value          |
| Interaction                                           | F (1, 96) = 3.514 | P=0.063884       |
| Stimulation length                                    | F (1, 96) = 163.4 | P<0.000001       |
| CalEx                                                 | F (1, 96) = 11.03 | P=0.001270       |
| Tukey's multiple comparisons test                     | Summary           | Adjusted P Value |
| 5s:Control vs. 5s:CalEx                               | ns                | 0.741596         |
| 5s:Control vs. 30s:Control                            | ****              | <0.000001        |
| 5s:Control vs. 30s:CalEx                              | ****              | <0.000001        |
| 5s:CalEx vs. 30s:Control                              | ****              | <0.000001        |
| 5s:CalEx vs. 30s:CalEx                                | ****              | <0.000001        |
| 30s:Control vs. 30s:CalEx                             | **                | 0.001971         |

**Figure 2j**

| <b>Peak astrocyte endfoot Ca<sup>2+</sup></b> |                    |                  |
|-----------------------------------------------|--------------------|------------------|
| ANOVA table                                   | F (DFn, DFd)       | P value          |
| Interaction                                   | F (1, 178) = 13.70 | P=0.0003         |
| Stimulation length                            | F (1, 178) = 20.93 | P<0.0001         |
| CalEx                                         | F (1, 178) = 34.54 | P<0.0001         |
| Tukey's multiple comparisons test             | Summary            | Adjusted P Value |
| 5s:Control vs. 5s:CalEx                       | ns                 | 0.434            |
| 5s:Control vs. 30s:Control                    | ****               | <0.0001          |
| 5s:Control vs. 30s:CalEx                      | ns                 | 0.7956           |
| 5s:CalEx vs. 30s:Control                      | ****               | <0.0001          |
| 5s:CalEx vs. 30s:CalEx                        | ns                 | 0.9416           |
| 30s:Control vs. 30s:CalEx                     | ****               | <0.0001          |

| <b>net Area Under the Curve of astrocyte endfoot Ca<sup>2+</sup></b> |                    |                  |
|----------------------------------------------------------------------|--------------------|------------------|
| ANOVA table                                                          | F (DFn, DFd)       | P value          |
| Interaction                                                          | F (1, 178) = 12.07 | P=0.0006         |
| Stimulation length                                                   | F (1, 178) = 19.91 | P<0.0001         |
| CalEx                                                                | F (1, 178) = 16.66 | P<0.0001         |
| Tukey's multiple comparisons test                                    | Summary            | Adjusted P Value |
| 5s:Control vs. 5s:CalEx                                              | ns                 | 0.9748           |
| 5s:Control vs. 30s:Control                                           | ****               | <0.0001          |
| 5s:Control vs. 30s:CalEx                                             | ns                 | 0.9932           |
| 5s:CalEx vs. 30s:Control                                             | ****               | <0.0001          |
| 5s:CalEx vs. 30s:CalEx                                               | ns                 | 0.9184           |
| 30s:Control vs. 30s:CalEx                                            | ****               | <0.0001          |

**Figure 2m**

| <b>Peak astrocyte process Ca<sup>2+</sup></b> |                    |                  |
|-----------------------------------------------|--------------------|------------------|
| ANOVA table                                   | F (DFn, DFd)       | P value          |
| Interaction                                   | F (1, 174) = 7.026 | P=0.0088         |
| Stimulation length                            | F (1, 174) = 14.31 | P=0.0002         |
| CalEx                                         | F (1, 174) = 19.31 | P<0.0001         |
| Tukey's multiple comparisons test             | Summary            | Adjusted P Value |
| 5s:Control vs. 5s:CalEx                       | ns                 | 0.623            |
| 5s:Control vs. 30s:Control                    | ****               | <0.0001          |
| 5s:Control vs. 30s:CalEx                      | ns                 | 0.9738           |
| 5s:CalEx vs. 30s:Control                      | ****               | <0.0001          |
| 5s:CalEx vs. 30s:CalEx                        | ns                 | 0.8815           |
| 30s:Control vs. 30s:CalEx                     | ****               | <0.0001          |

| <b>net Area Under the Curve of astrocyte process Ca<sup>2+</sup></b> |                    |                  |
|----------------------------------------------------------------------|--------------------|------------------|
| ANOVA table                                                          | F (DFn, DFd)       | P value          |
| Interaction                                                          | F (1, 171) = 10.08 | P=0.0018         |
| Stimulation length                                                   | F (1, 171) = 8.443 | P=0.0041         |
| CalEx                                                                | F (1, 171) = 21.16 | P<0.0001         |
| Tukey's multiple comparisons test                                    | Summary            | Adjusted P Value |
| 5s:Control vs. 5s:CalEx                                              | ns                 | 0.7539           |
| 5s:Control vs. 30s:Control                                           | ****               | <0.0001          |
| 5s:Control vs. 30s:CalEx                                             | ns                 | 0.6349           |
| 5s:CalEx vs. 30s:Control                                             | ****               | <0.0001          |
| 5s:CalEx vs. 30s:CalEx                                               | ns                 | 0.9981           |
| 30s:Control vs. 30s:CalEx                                            | ****               | <0.0001          |

**Figure 2p**

| <b>Peak neuronal Ca<sup>2+</sup></b> |                     |                  |
|--------------------------------------|---------------------|------------------|
| ANOVA table                          | F (DFn, DFd)        | P value          |
| Interaction                          | F (1, 126) = 0.3577 | P=0.5508         |
| Stimulation length                   | F (1, 126) = 14.27  | P=0.0002         |
| CalEx                                | F (1, 126) = 1.382  | P=0.2420         |
| Tukey's multiple comparisons test    | Summary             | Adjusted P Value |
| 5s:Control vs. 5s:CalEx              | ns                  | 0.7765           |
| 5s:Control vs. 30s:Control           | ns                  | 0.1766           |
| 5s:Control vs. 30s:CalEx             | ns                  | 0.3222           |
| 5s:CalEx vs. 30s:Control             | **                  | 0.0048           |
| 5s:CalEx vs. 30s:CalEx               | **                  | 0.0099           |
| 30s:Control vs. 30s:CalEx            | ns                  | 0.9989           |

| <b>net Area Under the Curve of neuronal Ca<sup>2+</sup></b> |                     |                  |
|-------------------------------------------------------------|---------------------|------------------|
| ANOVA table                                                 | F (DFn, DFd)        | P value          |
| Interaction                                                 | F (1, 126) = 0.7913 | P=0.3754         |
| Stimulation length                                          | F (1, 126) = 32.60  | P<0.0001         |
| CalEx                                                       | F (1, 126) = 0.8580 | P=0.3561         |
| Tukey's multiple comparisons test                           | Summary             | Adjusted P Value |
| 5s:Control vs. 5s:CalEx                                     | ns                  | >0.9999          |
| 5s:Control vs. 30s:Control                                  | ****                | <0.0001          |
| 5s:Control vs. 30s:CalEx                                    | **                  | 0.0046           |
| 5s:CalEx vs. 30s:Control                                    | ****                | <0.0001          |
| 5s:CalEx vs. 30s:CalEx                                      | **                  | 0.0034           |
| 30s:Control vs. 30s:CalEx                                   | ns                  | 0.7227           |

**Supplementary Table 3:** Details of statistical analysis related to Figure 3 (top 3 tables) and details of statistical analysis for locomotion co-variate analysis in a general linear model for variables presented in Figure 2 (arteriole peak  $\Delta d/d$ , net Area Under the Curve of arteriole dilation, neuronal  $Ca^{2+}$  max  $\Delta F/F$ , neuronal  $Ca^{2+}$  AUC, astrocyte endfoot  $Ca^{2+}$  max  $\Delta F/F$ , astrocyte endfoot  $Ca^{2+}$  AUC, astrocyte process  $Ca^{2+}$  max  $\Delta F/F$ , astrocyte process  $Ca^{2+}$  AUC)(bottom table).

**Fig 3a**

|                                |                                                   |
|--------------------------------|---------------------------------------------------|
|                                | Relative Locomotion during 5s whisker stimulation |
| Mann Whitney test (two-tailed) |                                                   |
| U Value                        | 2137                                              |
| P value                        | 0.1991                                            |
| P value summary                | ns                                                |

**Fig 3b**

|                                |                                                    |
|--------------------------------|----------------------------------------------------|
|                                | Relative Locomotion during 30s whisker stimulation |
| Mann Whitney test (two-tailed) |                                                    |
| U Value                        | 2555                                               |
| P value                        | 0.8977                                             |
| P value summary                | ns                                                 |

**Fig 3g**

| One-Way ANOVA                     |         |                  |
|-----------------------------------|---------|------------------|
| F (DFn, DFd)                      | Summary | P value          |
| F (2, 30) = 4.232                 | *       | P=0.0240         |
| Tukey's multiple comparisons test |         |                  |
| Group comparisons                 | Summary | Adjusted P Value |
| No stim vs. Startle               | *       | 0.0218           |
| No stim vs. Whisker stim          | ns      | 0.0667           |
| Startle vs. Whisker stim          | ns      | 0.6826           |

| <b>Co-variate analysis of locomotion in a general linear model of CalEx and Control groups</b> |     |        |       |         |
|------------------------------------------------------------------------------------------------|-----|--------|-------|---------|
|                                                                                                | df  | F      | p     | Summary |
| arteriole peak $\Delta d/d$                                                                    | 278 | 0.48   | 0.489 | ns      |
| arteriole dilation AUC                                                                         | 278 | 0.56   | 0.813 | ns      |
| neuronal $\text{Ca}^{2+}$ max $\Delta F/F$                                                     | 122 | 0.343  | 0.559 | ns      |
| neuronal $\text{Ca}^{2+}$ AUC                                                                  | 122 | 0.12   | 0.912 | ns      |
| astrocyte process $\text{Ca}^{2+}$ max $\Delta F/F$                                            | 161 | 1.998  | 0.16  | ns      |
| astrocyte process $\text{Ca}^{2+}$ AUC                                                         | 161 | 0.237  | 0.627 | ns      |
| astrocyte endfoot $\text{Ca}^{2+}$ max $\Delta F/F$                                            | 161 | 10.699 | 0.001 | **      |
| astrocyte endfoot $\text{Ca}^{2+}$ AUC                                                         | 161 | 5.561  | 0.02  | *       |

**Supplementary Table 4:** Details of statistical analysis related to Figure 4.

**Figure 4d**

| Paired t test (two-tailed) | <b>Astrocyte soma Ca<sup>2+</sup></b> | <b>Astrocyte endfoot Ca<sup>2+</sup></b> | <b>Arteriole diameter</b> |
|----------------------------|---------------------------------------|------------------------------------------|---------------------------|
| P value                    | <0.0001                               | 0.0002                                   | <0.0001                   |
| P value summary            | ****                                  | ****                                     | ****                      |
| t, df                      | t=7.539, df=13                        | t=5.210, df=13                           | t=7.453, df=13            |

**Figure 4e**

| <b>5s whisker stimulation</b> |                |                            |                |
|-------------------------------|----------------|----------------------------|----------------|
| Peak dilation (%)             |                | Dilation AUC               |                |
| Paired t test (two-tailed)    |                | Paired t test (two-tailed) |                |
| P value                       | 0.0533         | P value                    | 0.0944         |
| P value summary               | ns             | P value summary            | ns             |
| t, df                         | t=2.098, df=15 | t, df                      | t=1.786, df=15 |

**Figure 4f**

| <b>30s whisker stimulation</b> |                |                            |                |
|--------------------------------|----------------|----------------------------|----------------|
| Peak dilation (%)              |                | Dilation AUC               |                |
| Paired t test (two-tailed)     |                | Paired t test (two-tailed) |                |
| P value                        | 0.0056         | P value                    | 0.0099         |
| P value summary                | **             | P value summary            | **             |
| t, df                          | t=3.228, df=15 | t, df                      | t=2.950, df=15 |

**Figure 4i**

| <b>30s whisker stimulation</b> |                |
|--------------------------------|----------------|
| Peak neuronal Ca <sup>2+</sup> |                |
| Paired t test (two-tailed)     |                |
| P value                        | 0.0056         |
| P value summary                | **             |
| t, df                          | t=3.228, df=15 |



**Supplementary Table 5:** Details of statistical analysis related to Figure 5.

**Figure 5c**

| <b>Area Under the Curve of astrocyte endfoot Ca<sup>2+</sup></b> |                   |                  |
|------------------------------------------------------------------|-------------------|------------------|
| ANOVA table                                                      | F (DFn, DFd)      | P value          |
| Interaction                                                      | F (1, 77) = 2.543 | P=0.1149         |
| Stimulation length                                               | F (1, 77) = 6.838 | P=0.0107         |
| AP5                                                              | F (1, 77) = 9.712 | P=0.0026         |
| Tukey's multiple comparisons test                                | Summary           | Adjusted P Value |
| 5s:Control vs. 5s:AP5                                            | ns                | 0.7362           |
| 5s:Control vs. 30s:Control                                       | *                 | 0.0161           |
| 5s:Control vs. 30s:AP5                                           | ns                | 0.9856           |
| 5s:AP5 vs. 30s:Control                                           | ***               | 0.0005           |
| 5s:AP5 vs. 30s:AP5                                               | ns                | 0.8952           |
| 30s:Control vs. 30s:AP5                                          | **                | 0.004            |

**Figure 5d**

| <b>net Area Under the Curve of astrocyte process Ca<sup>2+</sup></b> |                   |                  |
|----------------------------------------------------------------------|-------------------|------------------|
| ANOVA table                                                          | F (DFn, DFd)      | P value          |
| Interaction                                                          | F (1, 96) = 3.514 | P=0.063884       |
| Stimulation length                                                   | F (1, 96) = 163.4 | P<0.000001       |
| AP5                                                                  | F (1, 96) = 11.03 | P=0.001270       |
| Tukey's multiple comparisons test                                    | Summary           | Adjusted P Value |
| 5s:Control vs. 5s:AP5                                                | ns                | 0.741596         |
| 5s:Control vs. 30s:Control                                           | ****              | <0.000001        |
| 5s:Control vs. 30s:AP5                                               | ****              | <0.000001        |
| 5s:AP5 vs. 30s:Control                                               | ****              | <0.000001        |
| 5s:AP5 vs. 30s:AP5                                                   | ****              | <0.000001        |
| 30s:Control vs. 30s:AP5                                              | **                | 0.001971         |

**Figure 5f**

| <b>Peak arteriole dilation</b>    |                    |                  |
|-----------------------------------|--------------------|------------------|
| ANOVA table                       | F (DFn, DFd)       | P value          |
| Interaction                       | F (1, 28) = 3.080  | P=0.0902         |
| Stimulation length                | F (1, 28) = 0.5535 | P=0.4631         |
| AP5                               | F (1, 28) = 6.919  | P=0.0137         |
| Tukey's multiple comparisons test | Summary            | Adjusted P Value |
| 5s:Control vs. 5s:AP5             | ns                 | 0.9251           |
| 5s:Control vs. 30s:Control        | ns                 | 0.3099           |
| 5s:Control vs. 30s:AP5            | ns                 | 0.5499           |
| 5s:AP5 vs. 30s:Control            | ns                 | 0.1032           |
| 5s:AP5 vs. 30s:AP5                | ns                 | 0.8904           |
| 30s:Control vs. 30s:AP5           | *                  | 0.0214           |

| <b>Area Under the Curve of arteriole dilation</b> |                   |                  |
|---------------------------------------------------|-------------------|------------------|
| ANOVA table                                       | F (DFn, DFd)      | P value          |
| Interaction                                       | F (1, 28) = 11.83 | P=0.0018         |
| Stimulation length                                | F (1, 28) = 8.388 | P=0.0072         |
| AP5                                               | F (1, 28) = 21.21 | P<0.0001         |
| Tukey's multiple comparisons test                 | Summary           | Adjusted P Value |
| 5s:Control vs. 5s:AP5                             | ns                | 0.8427           |
| 5s:Control vs. 30s:Control                        | ***               | 0.0006           |
| 5s:Control vs. 30s:AP5                            | ns                | 0.6267           |
| 5s:AP5 vs. 30s:Control                            | ****              | <0.0001          |
| 5s:AP5 vs. 30s:AP5                                | ns                | 0.9803           |
| 30s:Control vs. 30s:AP5                           | ****              | <0.0001          |

**Figure 5h**

| <b>Peak neuropil Ca<sup>2+</sup></b> |                      |                  |
|--------------------------------------|----------------------|------------------|
| ANOVA table                          | F (DFn, DFd)         | P value          |
| Interaction                          | F (1, 66) = 0.006692 | P=0.9350         |
| Stimulation length                   | F (1, 66) = 2.515    | P=0.1175         |
| AP5                                  | F (1, 66) = 15.73    | P=0.0002         |
| Tukey's multiple comparisons test    | Summary              | Adjusted P Value |
| 5s:Control vs. 5s:AP5                | *                    | 0.0464           |
| 5s:Control vs. 30s:Control           | ns                   | 0.6923           |
| 5s:Control vs. 30s:AP5               | ***                  | 0.0009           |
| 5s:AP5 vs. 30s:Control               | ns                   | 0.3563           |
| 5s:AP5 vs. 30s:AP5                   | ns                   | 0.6633           |
| 30s:Control vs. 30s:AP5              | *                    | 0.022            |

| <b>Area Under the Curve of neuropil Ca<sup>2+</sup></b> |                   |                  |
|---------------------------------------------------------|-------------------|------------------|
| ANOVA table                                             | F (DFn, DFd)      | P value          |
| Interaction                                             | F (1, 19) = 5.110 | P=0.0357         |
| Stimulation length                                      | F (1, 19) = 11.54 | P=0.0030         |
| AP5                                                     | F (1, 19) = 7.358 | P=0.0138         |
| Tukey's multiple comparisons test                       | Summary           | Adjusted P Value |
| 5s:Control vs. 5s:AP5                                   | ns                | 0.9891           |
| 5s:Control vs. 30s:Control                              | **                | 0.0031           |
| 5s:Control vs. 30s:AP5                                  | ns                | 0.9591           |
| 5s:AP5 vs. 30s:Control                                  | **                | 0.0024           |
| 5s:AP5 vs. 30s:AP5                                      | ns                | 0.8603           |
| 30s:Control vs. 30s:AP5                                 | **                | 0.0094           |

**Supplementary Table 6:** Details of statistical analysis related to Figure 6.

**Figure 6c**

| <b>Peak arteriole dilation</b>    |                   |                  |
|-----------------------------------|-------------------|------------------|
| ANOVA table                       | F (DFn, DFd)      | P value          |
| Interaction                       | F (1, 36) = 1.839 | P=0.1835         |
| Stimulation length                | F (1, 36) = 1.325 | P=0.2572         |
| MSPPOH                            | F (1, 36) = 7.568 | P=0.0092         |
| Tukey's multiple comparisons test | Summary           | Adjusted P Value |
| 5s:Control vs. 5s:MSPPOH          | ns                | 0.7581           |
| 5s:Control vs. 30s:Control        | ns                | 0.3027           |
| 5s:Control vs. 30s:MSPPOH         | ns                | 0.673            |
| 5s:MSPPOH vs. 30s:Control         | *                 | 0.0429           |
| 5s:MSPPOH vs. 30s:MSPPOH          | ns                | 0.9989           |
| 30s:Control vs. 30s:MSPPOH        | *                 | 0.0304           |

**Figure 6d**

| <b>Area Under the Curve of arteriole dilation</b> |                   |                  |
|---------------------------------------------------|-------------------|------------------|
| ANOVA table                                       | F (DFn, DFd)      | P value          |
| Interaction                                       | F (1, 36) = 5.522 | P=0.0244         |
| Stimulation length                                | F (1, 36) = 17.87 | P=0.0002         |
| MSPPOH                                            | F (1, 36) = 9.268 | P=0.0043         |
| Tukey's multiple comparisons test                 | Summary           | Adjusted P Value |
| 5s:Control vs. 5s:MSPPOH                          | ns                | 0.9606           |
| 5s:Control vs. 30s:Control                        | ***               | 0.0002           |
| 5s:Control vs. 30s:MSPPOH                         | ns                | 0.8366           |
| 5s:MSPPOH vs. 30s:Control                         | ****              | <0.0001          |
| 5s:MSPPOH vs. 30s:MSPPOH                          | ns                | 0.5517           |
| 30s:Control vs. 30s:MSPPOH                        | **                | 0.0028           |
